# Supplementary material for: “It Goes Hand in Hand with Us Trying to Get More Kids to Play” Stakeholder Experiences in a Sport and Active Recreation Voucher Program
Source: MDPI journal article supplement (doi:10.3390/ijerph20054081), 2023-02-24
Supplement: s1 [file s1]

## Supplementary File S1. Semi-structured interview topic guide

|                                                                                                                                                                                                                                                                                                                                             |
|---------------------------------------------------------------------------------------------------------------------------------------------------------------------------------------------------------------------------------------------------------------------------------------------------------------------------------------------|
| Could you tell me about [Organization name] and your role in this organization?                                                                                                                                                                                                                                                             |
| What has been your role in the implementation of the NSW Government's Active Kids program?                                                                                                                                                                                                                                                  |
| How did you hear about the program?                                                                                                                                                                                                                                                                                                         |
| What motivated you and [Organization name] to register and participate in the NSW Government's Active Kids program?                                                                                                                                                                                                                         |
| Can you provide detail regarding the approved activity which children can use their Active Kids voucher for?                                                                                                                                                                                                                                |
| Can you provide an approximation to what proportion of kids who registered at [Organization Name] used an Active Kids voucher?                                                                                                                                                                                                              |
| What do you think the NSW government is aiming to achieve through the program?                                                                                                                                                                                                                                                              |
| <p>Tell us about your overall experiences of the Active Kids program over the last 12 months?</p> <p><i>What has worked well?</i></p> <p><i>What are the positives to being a registered Active Kids provider and why?</i></p> <p><i>What has not worked well?</i></p> <p><i>Challenges of being a registered Active Kids provider?</i></p> |
| <p>What has been the impact of the Active Kids program on....</p> <p><i>Membership – numbers, ages/ nationality, gender and disability inclusion</i></p> <p><i>Staff and volunteers</i></p> <p><i>Partnerships</i></p> <p><i>Resource/Finance</i></p> <p><i>Marketing and promotion</i></p>                                                 |

Has being involved with the Active Kids program influenced the way your organisation operates?

Has the Active Kids program positively impacted linkage and compliance of your affiliate or underpinning programs/organisations/providers?

What would help [Organization Name] to increase the reach and develop new tailored initiatives.

Will you continue to be part of the Active Kids program over the next 12 months?

Additional Comments
